# Supplementary material for: The time series seasonal patterns of dengue fever and associated weather variables in Bangkok (2003-2017)
Source: BMC Infect Dis. 2020 Mar 12;20:208. doi: 10.1186/s12879-020-4902-6 (PMC7068876; doi:10.1186/s12879-020-4902-6)
Supplement: Supplementary file 1 — Additional file 1 Data set sheet contains the climate data in Bangkok form 2003-2017. Table S1 is mean temperature. Table S2 is rainfall. Table S3 is humidity. Table S4 is Dengue incidence number in Bangkok from 2003 to 2017. Correlation sheet contains the correlation between dengue case number and climate data in Bangkok. [file 12879_2020_4902_MOESM1_ESM.xlsx]

## Sheet: Sheet1
Table 1: Mean Temperature ( C° ) in Bangkok from 2003 to 2017 [1]
	Jan	Feb	Mar	Apr	May	Jun	Jul	Aug	Sep	Oct	Nov	Dec
2003	27.8	29.65	29.8	31.75	31.05	30.2	29.35	29.85	28.8	29.35	30.1	27.4
2004	28.25	28.3	30.75	32.2	30.15	29.4	29.95	29.4	29.3	30.1	30.2	27.6
2005	27.8	29.75	29.9	31.1	31.15	30.5	29.85	29.85	29.15	29.5	28.65	26.7
2006	28.3	29.7	30.85	31.4	30.65	30.15	30.25	29.9	29.6	30.05	30.55	28.15
2007	28.45	29.15	31.55	31.95	30.25	30.85	29.85	29.85	29.9	29.4	28.05	29.4
2008	28.55	28.75	30.45	31.35	30.1	29.85	29.25	29.6	29.25	29.3	28.05	26.65
2009	26.1	30	30.85	31.05	29.95	29.95	29.55	29.9	29.7	29.25	28.6	28.55
2010	28.7	30.3	31.3	32.65	32.5	31.45	30.4	29.65	29.65	28.65	28.6	28.15
2011	27.5	29.7	27.8	30.15	30.7	30.05	29.45	29.5	29.4	29.15	29.9	27.4
2012	29	29.65	31.65	32.35	31.5	30.5	29.8	29.7	29.05	29.7	29.7	29.75
2013	28.5	30.45	31.45	32.05	32.15	30.3	29.55	29.95	29.15	29.1	29.3	25.95
2014	26.5	29	30.7	32.55	32.75	31.2	30.5	29.95	30.15	29.55	30.15	28.25
2015	27.35	29.4	30.8	31.3	32.15	31	30.7	30.75	30.05	29.4	30.4	29.2
2016	28.25	28.85	30.95	32.65	32.45	30.3	30.3	30.5	29.6	29.55	29.8	28.75
2017	28.65	29.75	31.25	31.85	30.65	30.5	29.6	30.2	30.15	29.15	28.95	27.15
Table 2: Rainfall (mm) in Bangkok from 2003 to 2017 [1]
	Jan	Feb	Mar	Apr	May	Jun	Jul	Aug	Sep	Oct	Nov	Dec
2003	0	0.7	134.6	12.3	159.4	191.9	228.8	315.2	207.8	121.3	0	0
2004	46.4	72.8	3.5	91.1	94.9	170.1	182.7	230	213.8	50.1	5	0
2005	2.7	1.4	17.4	123.2	283.7	107.4	150.3	139.2	358.5	262	172.5	33.1
2006	0.9	38.9	74.5	37.5	250.1	278.1	149.7	71.1	317.3	336.8	42.9	0.9
2007	29.9	0	12.7	143.1	309.5	268.2	267.9	147	262.4	225.9	17.6	0
2008	62.1	69.3	3.6	180.8	257.9	163.6	221.8	172.1	335.2	399.3	36.7	0
2009	0	0	30.2	359.6	463.4	219.3	175.7	354	351.8	264.2	46.5	7.3
2010	99.9	2.9	14.6	17.3	279.3	198.8	348.7	343.1	409.5	256.3	30.6	22.7
2011	0.3	21.8	173.3	134.7	296.5	411.9	317.6	297	223.6	362	0.9	0.7
2012	44.2	64.9	24.1	56.1	121.9	134.8	196.4	186.6	601.1	201.2	88.9	8.1
2013	41.2	7.4	38	89.9	149.2	175.6	200.1	233.6	364.1	392.3	79.9	1.6
2014	0	2.1	39.6	7.8	99.9	147.4	98.2	276	188	217.9	22.2	31
2015	3.5	16.8	183.9	128.9	82.5	456.5	220.8	50.5	352.4	334.2	34.9	42.7
2016	72.6	0	54.1	31.1	101.7	464.4	162.7	348.8	356	293.8	121.7	0
2017	45.1	0	106.3	13.4	486.7	228.8	319.6	370.7	445.8	561.3	45.6	52.5
Table 3: Humidity [1] in Bangkok from 2003 to 2017
	Jan	Feb	Mar	Apr	May	Jun	Jul	Aug	Sep	Oct	Nov	Dec
2003	68	70	75	70	70	72	79	75	79	74	62	58
2004	68	72	72	69	74	75	71	74	76	66	60	56
2005	69	74	70	73	73	73	73	74	78	77	74	66
2006	64	68	70	70	73	75	73	72	78	75	66	60
2007	61	69	71	71	77	75	77	75	76	73	62	62
2008	64	70	68	72	75	75	76	75	77	80	70	63
2009	62	68	71	71	77	75	75	75	79	80	68	66
2010	73	75	69	71	75	75	79	81	81	80	66	69
2011	60	73	76	77	78	79	80	81	81	81	65	61
2012	72	76	72	70	74	75	78	79	85	78	79	70
2013	67	70	73	71	72	80	79	79	83	79	73	63
2014	59	74	74	71	70	76	76	80	79	80	73	65
2015	66	67	76	72	72	74	74	73	81	81	75	71
2016	73	67	73	73	73	81	80	82	80	82	76	68
2017	73	62	73	71	81	76	77	78	78	81	72	66
Table 4: Dengue incidence number [2] in Bangkok from 2003 to 2017
	Jan	Feb	Mar	Apr	May	Jun	Jul	Aug	Sep	Oct	Nov	Dec
2003	46	29	36	47	165	373	591	374	192	162	121	70
2004	295	185	330	191	179	261	634	687	760	636	689	410
2005	383	282	253	249	740	648	593	484	541	430	491	298
2006	519	349	418	219	796	979	835	692	683	709	643	790
2007	600	282	323	273	448	725	698	768	839	842	958	529
2008	601	550	605	656	715	1026	1174	1406	620	1660	1154	842
2009	502	310	322	266	409	777	725	888	772	880	1068	954
2010	617	621	591	381	348	536	901	1399	1576	1654	1462	826
2011	690	421	389	468	1068	1436	1539	1238	873	780	1078	594
2012	310	266	276	256	211	340	704	1031	1063	1666	2259	1646
2013	1509	760	643	551	635	965	1862	2139	1640	1650	1596	827
2014	405	313	251	168	170	212	348	408	533	625	809	476
2015	614	445	418	414	1001	1099	1591	2391	2815	3961	8337	3185
2016	1911	823	535	251	124	123	361	607	623	724	780	604
2017	394	250	215	220	275	679	1253	1458	1116	1141	1359	858
[1] The Department of Meteorology, Ministry of the Digital Economy and Society of Thailand: Climate Information Services. 2018. url: https://www.tmd.go.th/cis/main.php
[2] Bureau of Epidemiology, Department of Disease Control, Ministry of Public Health of Thailand: Dengue Fever Report. 2018. url: http://www.boe.moph.go.th/boedb/surdata/disease.php?ds=262766

## Sheet: Sheet3
					Lag	Temperature	Rainfall	Humidity
					0	-0.0955243	0.162406	0.228311
					1	-0.00768342	0.372558	0.379872
					2	0.143943	0.396286	0.388442
					3	0.270786	0.245333	0.267814
Figure 1 : Nonlinear association between Climate factors and Dengue cases in this study.
